# Supplementary material
Source: PubMed Central journal article supplement (PMC3636408)
Supplement: 11357_2012_9413_MOESM1_ESM.pdf [file 11357_2012_9413_MOESM1_ESM.pdf]

## Electronic Supplementary Material

Cardiovascular risk in cognitively preserved elderly is associated with glucose hypometabolism in the posterior cingulate cortex and precuneus regardless of brain atrophy and apolipoprotein gene variations.

AGE - The Official Journal of the American Aging Association.

Jaqueline Hatsuko Tamashiro-Duran<sup>1</sup>, Paula Squarzoni<sup>1</sup>, Fábio Luís de Souza Duran<sup>1</sup>, Pedro Kallas Curiati<sup>1</sup>, Homero Pinto Vallada<sup>2</sup>, Carlos Alberto Buchpiguel<sup>3</sup>, Paulo Andrade Lotufo<sup>4</sup>, Mauricio Wajngarten<sup>5</sup>, Paulo Rossi Menezes<sup>6</sup>, Márcia Scazufca<sup>2</sup>, Tânia Corrêa de Toledo Ferraz Alves<sup>1,7</sup>, Geraldo Filho Busatto<sup>1</sup>

<sup>1</sup> Laboratory of Neuroimaging in Psychiatry (LIM-21), Department of Psychiatry, University of Sao Paulo Medical School, SP, Brazil.

<sup>2</sup> Department of Psychiatry, University of Sao Paulo Medical School, SP, Brazil.

<sup>3</sup> Nuclear Medicine Center, Department of Radiology, University of Sao Paulo Medical School, SP, Brazil.

<sup>4</sup> Internal Medicine Division, University Hospital of the University of Sao Paulo, SP, Brazil.

<sup>5</sup> Heart Institute, General Hospital of University of Sao Paulo Medical School, SP, Brazil.

<sup>6</sup> Department of Preventive Medicine, University of Sao Paulo Medical School, SP, Brazil.

<sup>7</sup> ABC Region Medical School, SP, Brazil.

**Correspondence to: Jaqueline Hatsuko Tamashiro-Duran**

**E-mail: [jhatsu@gmail.com](mailto:jhatsu@gmail.com)**

## **Online Resource 1 : Image-processing steps**

### **MR images**

The skull-stripped MR images were first interpolated to get an isotropic resolution ( $2 \times 2 \times 2 \text{ mm}^3$ ). These resultant MR images were coregistered on their respective FDG-PET images. The coregistered MR images were processed using the Unified Segmentation (Ashburner and Friston, 2005) and DARTEL toolbox (Diffeomorphic Anatomical Registration Through Exponentiated Lie Algebra) (Ashburner, 2007) to enable a more accurate spatial normalization. This approach registers all gray matter and white matter images to an averaged-size template created from all individuals used in this study and modulates the images to preserve the total amount of signal from each region in the images.

### **FDG-PET images**

The PET images were coregistered to MR images and interpolated to the same voxel size as the MR images, namely  $2 \times 2 \times 2 \text{ mm}^3$ . After all PET images were corrected for partial volume effects (PVE) through the Meltzer method (Meltzer *et al.*, 2000), the DARTEL flow fields calculated from the MR images were applied to their respective PET images to obtain an anatomically exact overlap between gray matter and PET images of all subjects with modulation to preserve the total amount of signal from each region. In the same way as the MR data, the PET data were smoothed by Gaussian kernel of 12 mm full-width at half-maximum.
